# Supplementary material for: Four decades of global surface albedo estimates in the third edition of the CM SAF cLoud, Albedo and surface Radiation (CLARA) climate data record
Source: Copernicus journal article supplement (doi:10.5194/essd-16-1007-2024), 2024-02-22
Supplement: Supplementary file 1 [file essd-16-1007-2024-supplement.pdf]

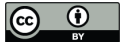

*Supplement of*

**Four decades of global surface albedo estimates in the third edition of the CM SAF cLOUD, Albedo and surface Radiation (CLARA) climate data record**

**Aku Riihelä et al.**

*Correspondence to:* Aku Riihelä ([aku.riihela@fmi.fi](mailto:aku.riihela@fmi.fi))

The copyright of individual parts of the supplement might differ from the article licence.

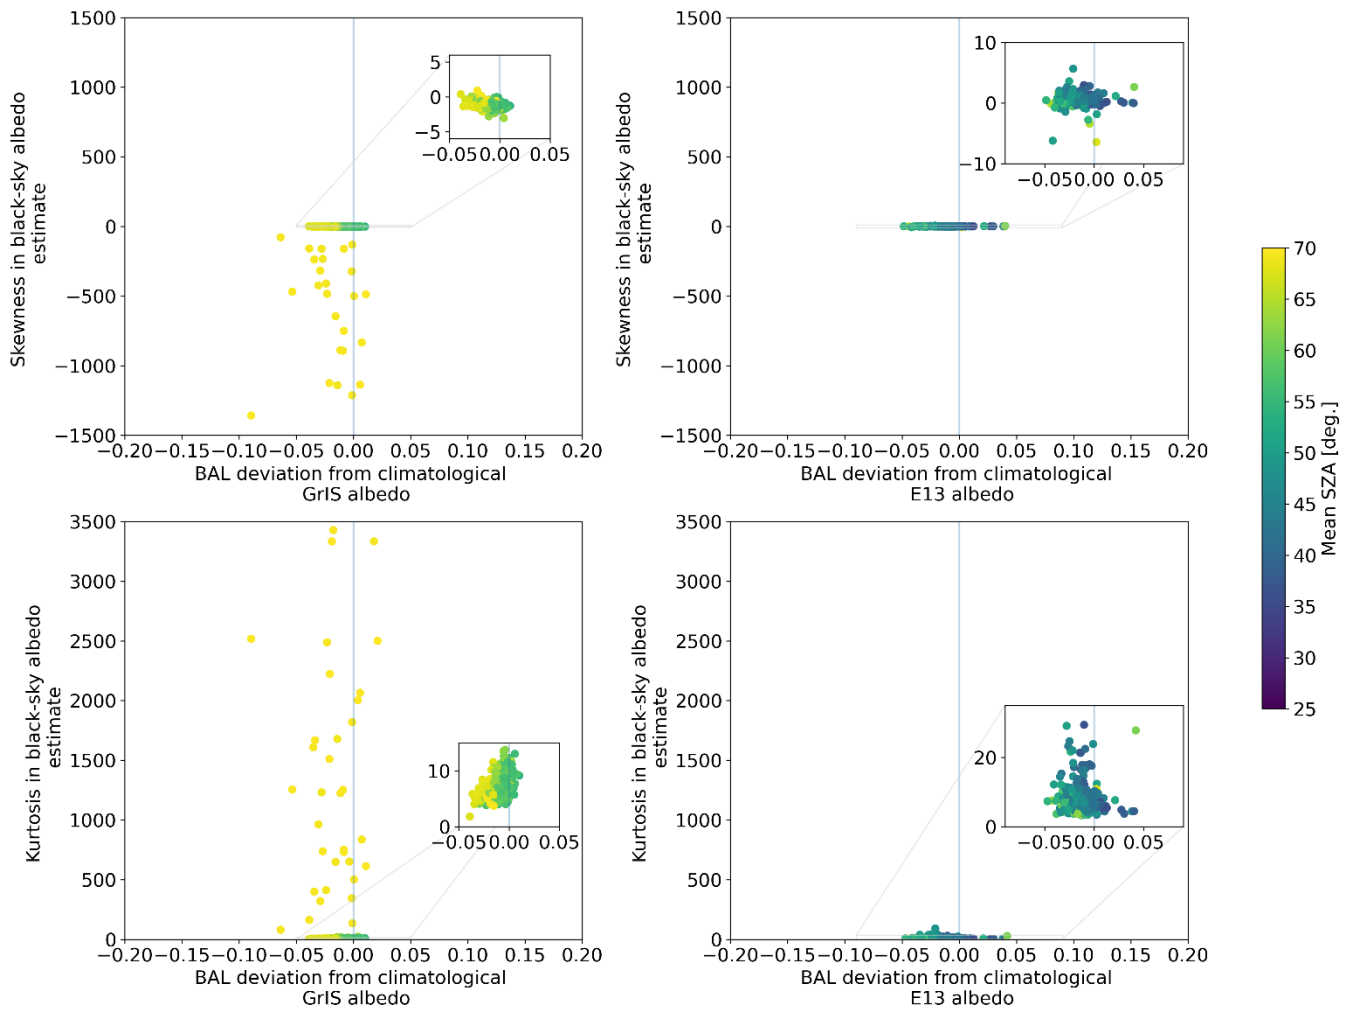

**Figure S1: Deviation of monthly mean BAL from climatologically expected surface albedos over central GrIS (left column) and the Kansas plains containing the E13 BSRN site (right column) as a function of skewness (top row) and kurtosis (bottom row) of SAL. Marker color indicates mean SZA of clear-sky observations for each month.**

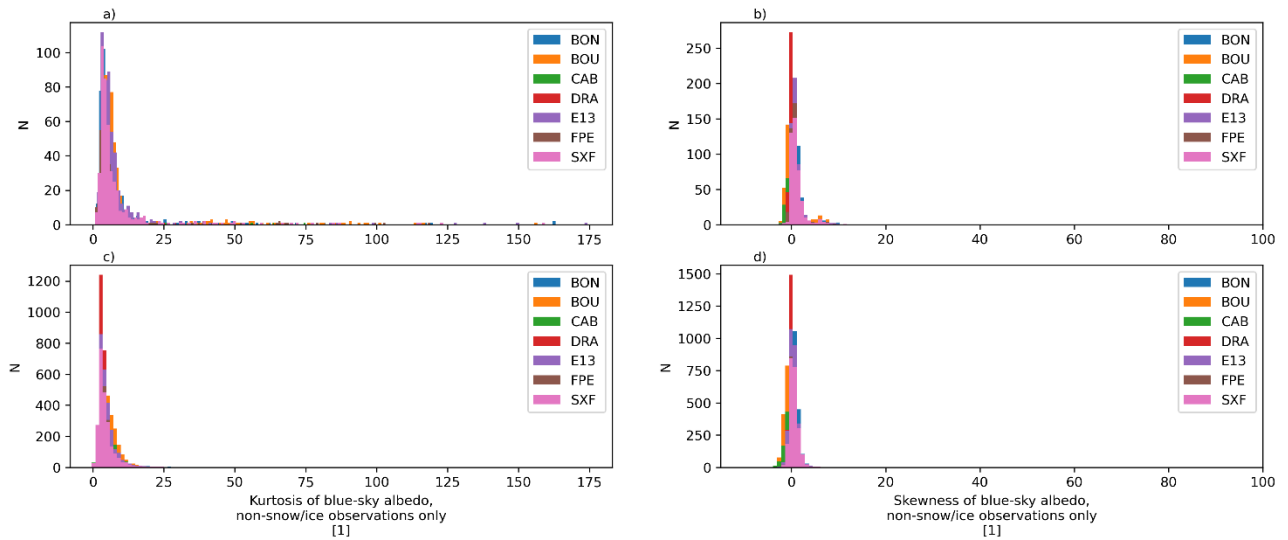

**Figure S2: a) Monthly mean kurtosis of 1979-2020 CLARA-A3 BAL over BSRN sites (snow-free observations), b) Monthly mean skewness of 1979-2020 CLARA-A3 BAL over BSRN sites (snow-free observations), c) as subplot a, but for pentad means, d) as subplot b, but for pentad means. Extents cropped to exclude individual large-value outliers (less than 0.1% of all data).**

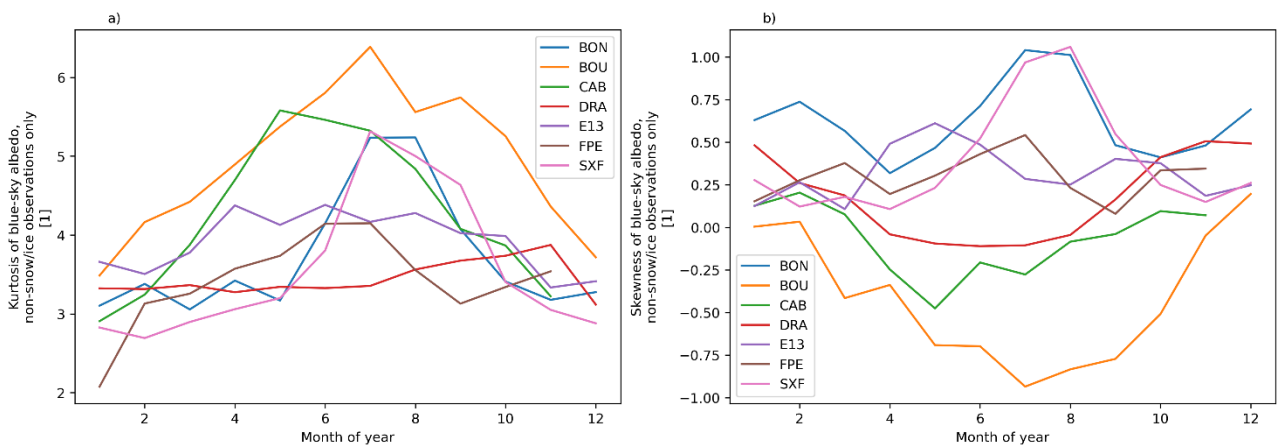

**Figure S3: a) Median kurtosis of 1979-2020 pentad mean blue-sky albedo over the BSRN sites (snow-free observations) as a function of observation month, b) Median skewness of 1979-2020 pentad mean blue-sky albedo over the BSRN sites as a function of observation month.**

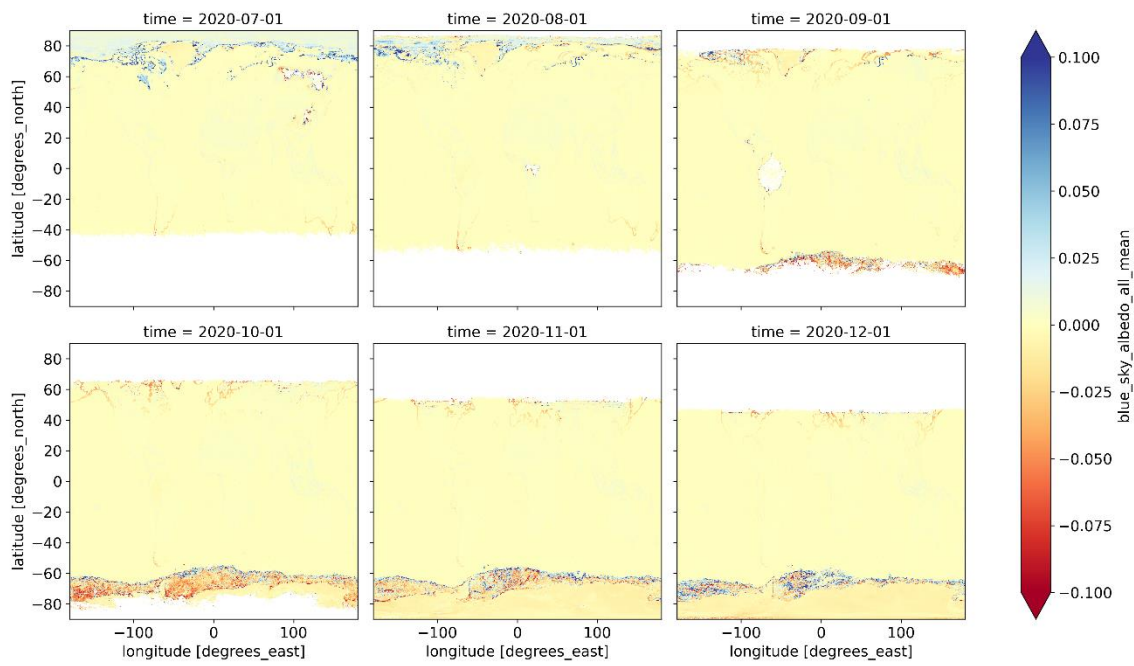

**Figure S4: Difference (TCDR minus ICDR) for blue-sky albedo BAL in the monthly means of July-December 2020. Similar figures are available for other albedo variables in the CLARA-A3 validation report.**

Supplementary Table 1: Climatological blue-sky albedos used to derive albedo maps from Dynamic World LU data

| Land cover    | Assigned climatological blue-sky albedo | Source                      |
|---------------|-----------------------------------------|-----------------------------|
| Water         | 0.076                                   | Consistent with CLARA-A1/A2 |
| Forest        | 0.14                                    | He et al. (2014)            |
| Flooded vegt. | 0.16                                    | He et al. (2014)            |
| Cropland      | 0.19                                    | He et al. (2014)            |
| Shrub         | 0.2                                     | He et al. (2014)            |
| Built area    | 0.15                                    | Trlica et al. (2017)        |
| Bare ground   | 0.25                                    | He et al. (2014)            |
| Snow and ice  | 0.8                                     | He et al. (2014)            |

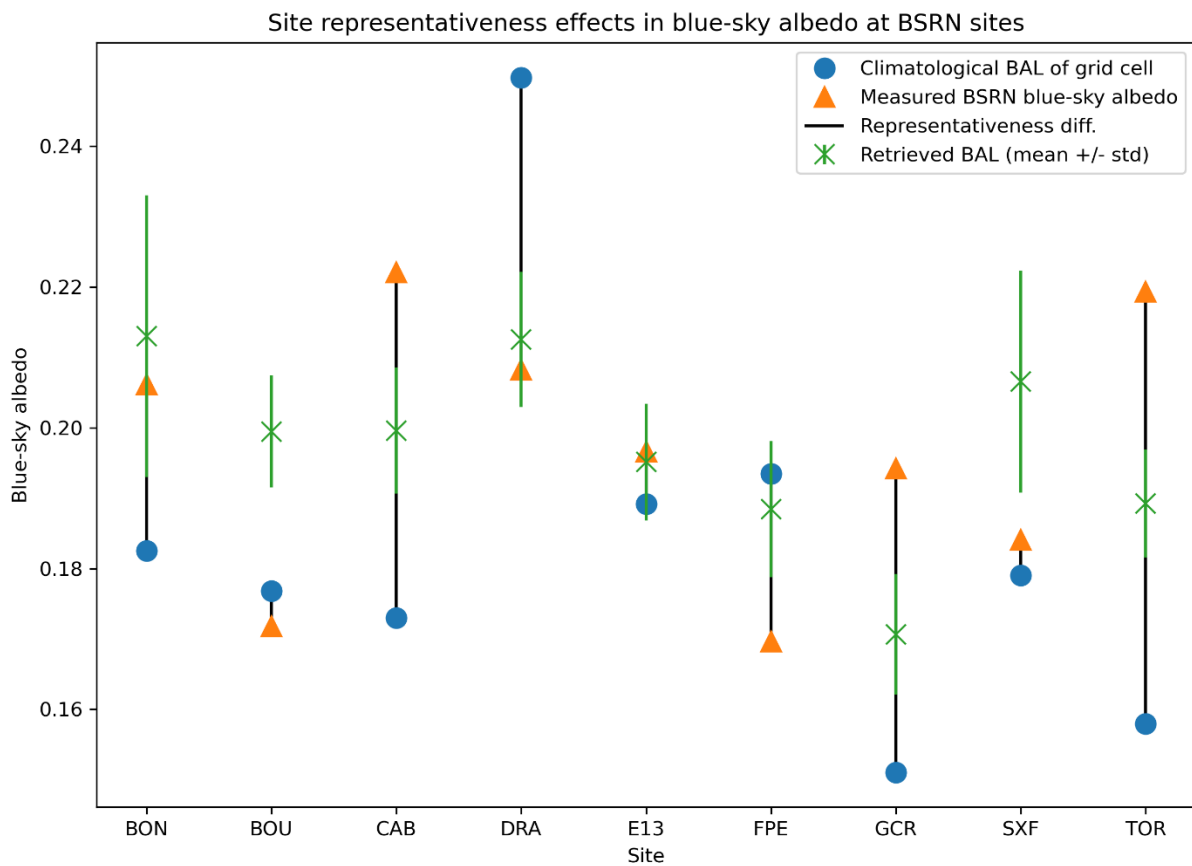

Figure S5: Spatial representativeness analysis for BSRN sites. Blue circles indicate expected grid cell-mean albedos from Google Earth Engine’s Dynamic World land cover data combined with climatological surface albedos for each land cover class. Orange triangles indicate measured mean albedo at the BSRN site. The lengths of the black lines connecting the two are indicative of spatial unrepresentativeness of the station measurement for its surroundings; retrieved mean CLARA BAL of the grid cell in question is marked with green cross-with-whiskers, whiskers denoting standard deviation of BAL. Dynamic World data is from June-August 2018; BAL and BSRN observations are means of all data available at each site in question.

CAB, DRA, GCR, and TOR display the largest differences (>0.04) between (expected) grid cell and *in situ* albedo. However, a close inspection of the classifications in Dynamic World reveals that the area around DRA in Southwestern US is classified as “bare ground”, whose climatological surface albedo is markedly high at 0.25 (He et al., 2014). Conversely, the ESA CCI land cover data (ESA, 2017) classifies the region as “shrubland”, whose climatological albedo of 0.2 is in close agreement with both the *in situ* measurement and the mean

retrieved BAL. We therefore consider DRA as representative despite the apparent disagreement. At CAB, CCI land cover reports predominance of grassland, whereas DW assigns the area to a grassland-cropland mix. The fractions of built area also disagree somewhat at CAB, leading to some ambiguity in whether the site should be considered representative or not. We elected to retain CAB in the summary statistics. However, at GCR and TOR the disagreement clearly results from a large proportion of forest cover in the CLARA grid cell, whose effects on albedo are captured by the BAL retrievals but not the near-surface *in situ* measurement. GCR and TOR are therefore excluded from further retrieval performance analysis.

Interestingly, albeit expectedly, BAL retrievals with their standard deviation fall within the 'representativeness range' at all sites excepting two: BOU and SXF. Both sites are characterized by the presence of large metropolitan areas in the CLARA grid cell though the site itself is rural. The higher-than-expected BAL may therefore indicate suboptimal atmospheric correction accuracy close to urban centers, which would be in accordance with the design of SMAC, and the potentially missed small-scale aerosol variability over such areas.

For 3 of the 4 polar BSRN sites (ALE, GVN, SYO), the principal representativeness challenge rises from the variable delineation between sea ice and open water in the CLARA grid cells containing them. We calculated and extracted time series (not shown) of observed open water fraction from Sentinel-2 in DW at these sites, noting that open water fractions were at times quite large around GVN and ALE ( $>0.2$ ), though cloudiness often limited available sampling markedly. Therefore, we elected to also exclude GVN and ALE from the results.

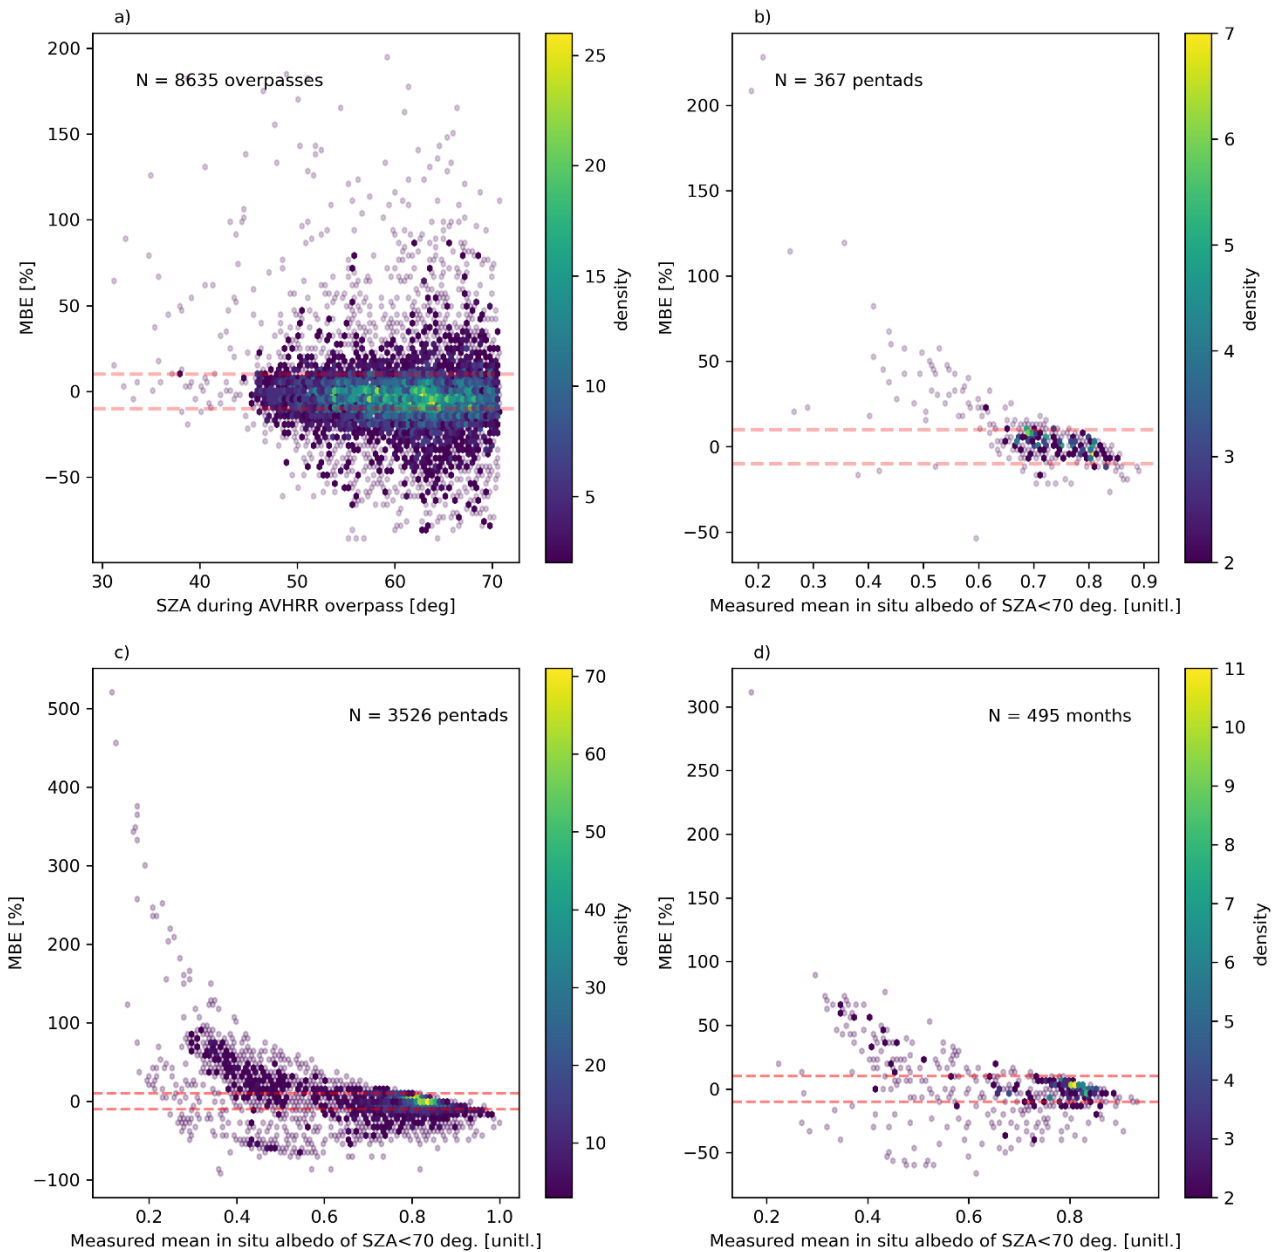

**Figure S6:** a) Relative retrieval bias (MBE in %) of individual directional-directional snow broadband reflectance retrievals against spatiotemporally collocated BSRN surface albedo observations as a function of site Sun Zenith Angle, b) relative bias (MBE, %) of those pentad CLARA estimates over BSRN sites where the pentad contains at least 5 clear-sky overpasses with site surface classified as snow, as a function of period-mean measured in situ albedo, c) relative bias (MBE, %) of all CLARA pentads over valid PROMICE sites as a function of period-mean measured in situ albedo, and d) relative bias (MBE, %) of all CLARA monthly means over valid PROMICE sites as a function of period-mean measured in situ albedo. Red horizontal lines in all subplots indicate  $\pm 10\%$  relative bias. Marker color indicates sampling density in each bin. Semitransparent markers indicate bins containing only 1 or 2 data points.

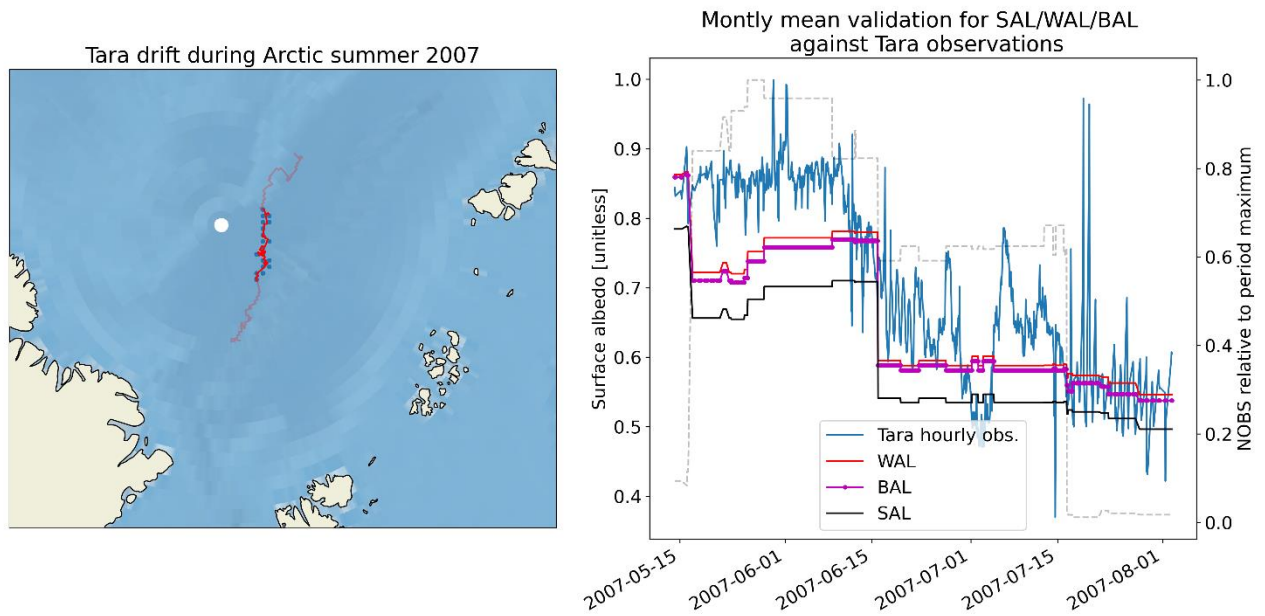

**Figure S7: Left: Tara drift across the Arctic Ocean during summer 2007. Right: Hourly in situ observed surface albedo at Tara (blue), and the retrieved grid cell-scale BAL (purple), WAL (red), and SAL (black). Identificaiton of the CLARA grid cell containing the Tara ice camp is updated for each hourly observation, explaining the at-times rapid shifts in satellite-based albedo estimates. Dashed line on the right y-axis shows the number of valid AVHRR-GAC observations in each monthly mean, normalized to the maximum observed during the summer in question.**



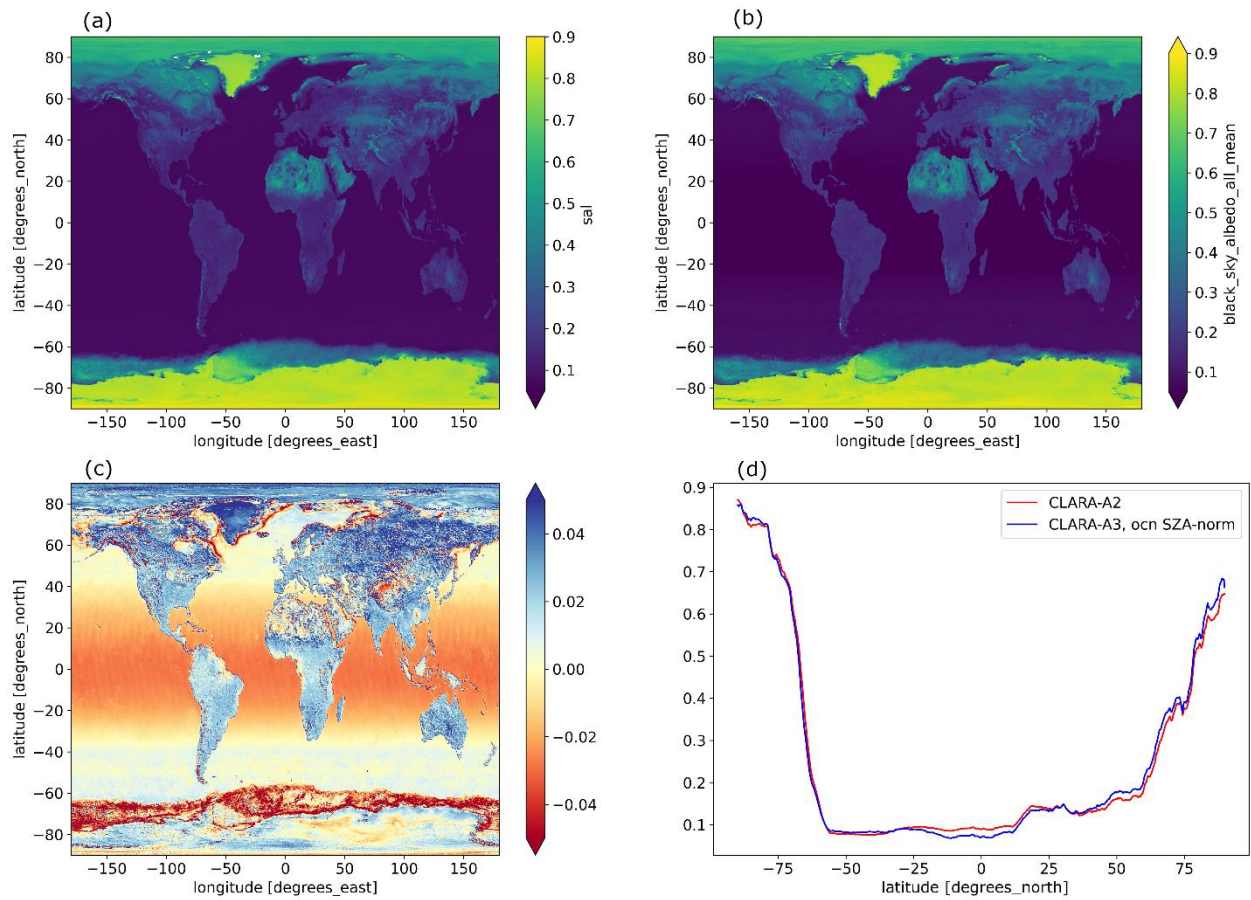

**Figure S8: Intercomparison of CLARA-A3 and CLARA-A2 black-sky albedo estimates. Data shown corresponds to the mean of April-September 2015. (a) CLARA-A2, (b) CLARA-A3, (c) difference (CLARA-A3 - CLARA-A2), (d) zonal means of CLARA-A2 and CLARA-A3.**

Additional references:

ESA. Land Cover CCI Product User Guide Version 2. Tech. Rep. (2017). Available at: [maps.elie.ucl.ac.be/CCI/viewer/download/ESACCI-LC-Ph2-PUGv2\\_2.0.pdf](https://maps.elie.ucl.ac.be/CCI/viewer/download/ESACCI-LC-Ph2-PUGv2_2.0.pdf)
